# Supplementary material for: Metabolomics of the Protective Effect of Ampelopsis grossedentata and Its Major Active Compound Dihydromyricetin on the Liver of High‐Fat Diet Hamster
Source: Hindawi journal article supplement (doi:10.1155/2020/3472578), 2020-01-01
Supplement: f1 [file 3472578.f1.pdf]

## Supplementary materials

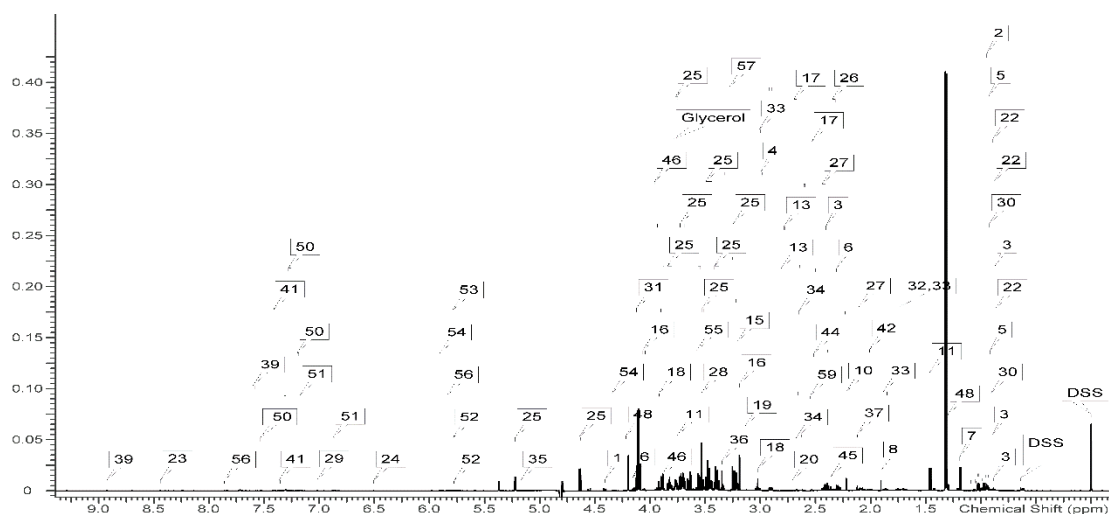

FIGURE 1: Representative 600-MHz  $^1\text{H-NMR}$  spectra and PLS-DA analysis of  $^1\text{H-NMR}$  spectral data. FIGURE 1 Representative  $^1\text{H-NMR}$  spectra at 600 MHz of liver (a) and plasma (b) from golden hamster dosed with high-fat diet supplemented with *Ampelopsis grossedentata* group (2g/kg.d).

|    |                        |    |                     |    |                             |
|----|------------------------|----|---------------------|----|-----------------------------|
| 1  | 1,3-Dihydroxyacetone   | 23 | Fumarate            | 45 | Phenylalanine               |
| 2  | 2'-Deoxyadenosine      | 24 | Glucose             | 46 | Proline                     |
| 3  | 3-Hydroxybutyrate      | 25 | Glutamate           | 47 | Pyroglutamate               |
| 4  | 3-Methyl-2-oxovalerate | 26 | Glutamine           | 48 | Ribose                      |
| 5  | 4-Aminobutyrate        | 27 | Glycine             | 49 | Sarcosine                   |
| 6  | Acetate                | 28 | Histidine           | 50 | Serine                      |
| 7  | Acetoacetate           | 29 | Hypoxanthine        | 51 | Succinate                   |
| 8  | Acetone                | 30 | Inosine             | 52 | Taurine                     |
| 9  | Adenine                | 31 | Isoleucine          | 53 | Threonine                   |
| 10 | Alanine                | 32 | Lactate             | 54 | Thymidine                   |
| 11 | Allantoin              | 33 | Leucine             | 55 | Thymine                     |
| 12 | Ascorbate              | 34 | Lysine              | 56 | Trimethylamine              |
| 13 | Asparagine             | 35 | Malate              | 57 | Tryptophan                  |
| 14 | Aspartate              | 36 | Maltose             | 58 | Tyrosine                    |
| 15 | Betaine                | 37 | Mannose             | 59 | Uracil                      |
| 16 | Choline                | 38 | Methanol            | 60 | Urea                        |
| 17 | Creatine               | 39 | Methionine          | 61 | Uridine                     |
| 18 | Cytidine               | 40 | N,N-Dimethylglycine | 62 | Valine                      |
| 19 | Dimethylamine          | 41 | Niacinamide         | 63 | Xanthosine                  |
| 20 | Ethanol                | 42 | O-Phosphocholine    | 64 | myo-Inositol                |
| 21 | Ethanolamine           | 43 | Ornithine           | 65 | sn-Glycero-3-phosphocholine |
| 22 | Formate                | 44 | Pantothenate        | 66 | $\beta$ -Alanine            |

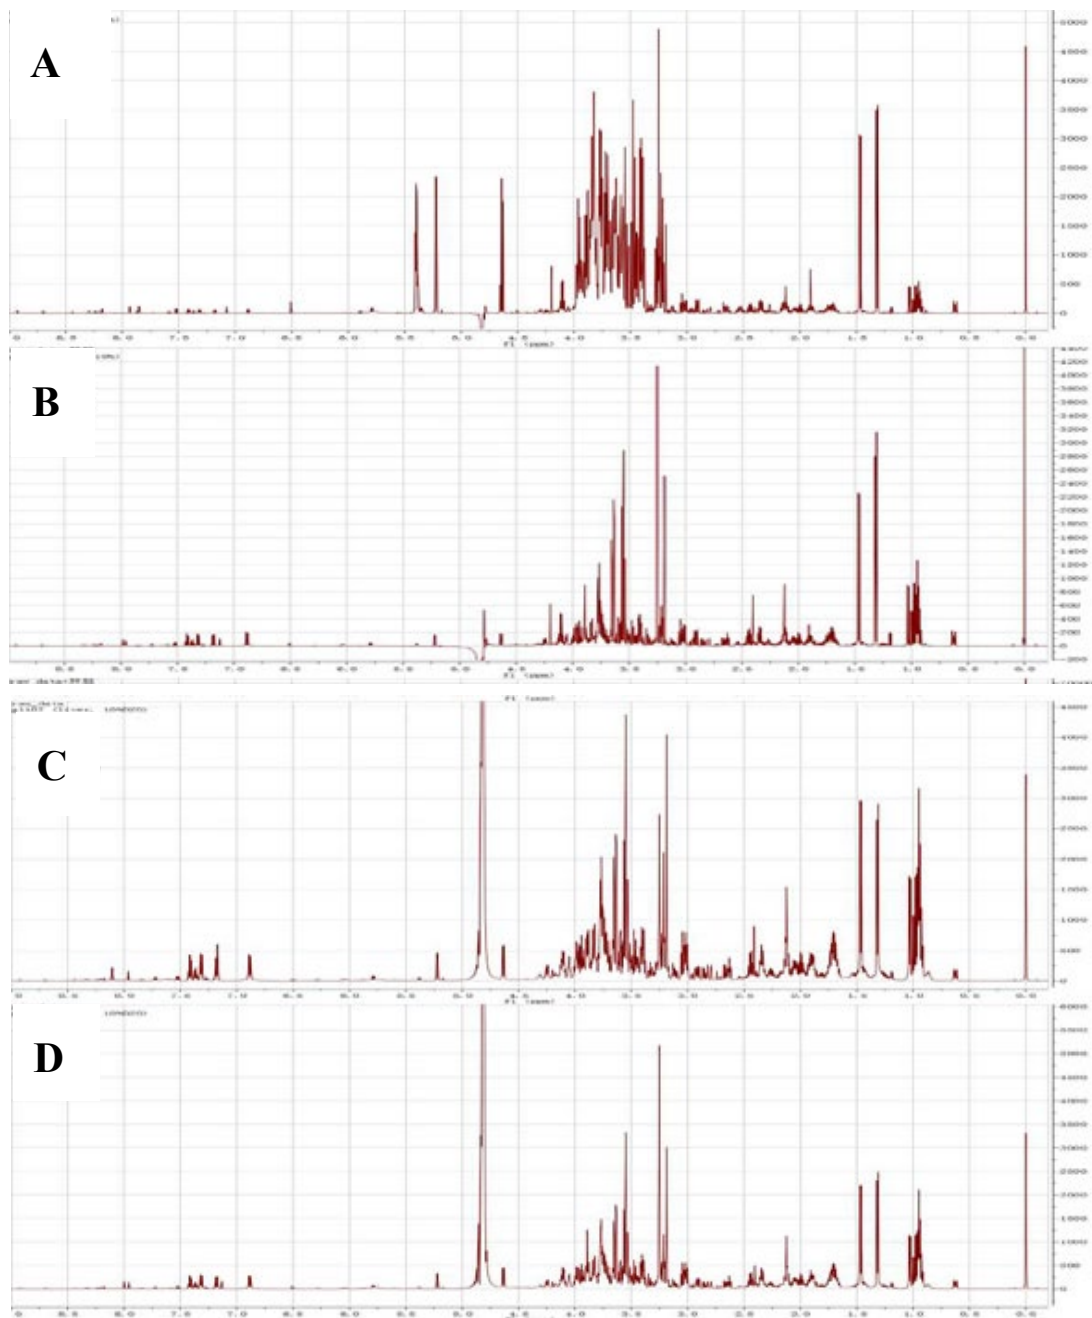

FIGURE 2: Liver  $^1\text{H}$  NMR spectrum: A, normal diet (ND); B, high-fat diet (HFD); C, high-fat diet supplemented with *Ampelopsis grossedentata* (HFD + AG); D, high-fat diet supplemented with dihydromyricetin group (HFD + DMY).

Table 1: Metabolic Pathway Analysis of Golden Hamster (HFD vs ND).

|                                             | Total Cmpd | Hits | Raw p | - log(p) | Holm p | FDR   | Impact |
|---------------------------------------------|------------|------|-------|----------|--------|-------|--------|
| Alanine, aspartate and glutamate metabolism | 24         | 8    | 7E-10 | 21.08    | 3E-08  | 5E-09 | 0.86   |
| Synthesis and degradation of ketone bodies  | 6          | 3    | 8E-07 | 14.01    | 2E-05  | 2E-06 | 0.70   |
| Glycine, serine and threonine metabolism    | 48         | 10   | 4E-09 | 19.25    | 2E-07  | 1E-08 | 0.53   |
| Taurine and hypotaurine metabolism          | 20         | 3    | 2E-07 | 15.55    | 5E-06  | 4E-07 | 0.36   |
| Arginine and proline metabolism             | 77         | 10   | 7E-08 | 16.46    | 2E-06  | 2E-07 | 0.36   |
| beta-Alanine metabolism                     | 28         | 6    | 2E-05 | 10.79    | 3E-04  | 3E-05 | 0.26   |
| Pantothenate and CoA biosynthesis           | 27         | 5    | 2E-08 | 17.52    | 7E-07  | 6E-08 | 0.25   |
| Pyruvate metabolism                         | 32         | 4    | 9E-07 | 13.88    | 2E-05  | 2E-06 | 0.24   |
| Aminoacyl-tRNA biosynthesis                 | 75         | 18   | 1E-06 | 13.50    | 3E-05  | 2E-06 | 0.23   |
| Methane metabolism                          | 34         | 7    | 1E-09 | 20.74    | 4E-08  | 5E-09 | 0.20   |
| Glyoxylate and dicarboxylate metabolism     | 50         | 3    | 3E-10 | 21.89    | 2E-08  | 4E-09 | 0.17   |
| Lysine degradation                          | 47         | 2    | 1E-05 | 11.20    | 2E-04  | 2E-05 | 0.15   |
| Histidine metabolism                        | 44         | 3    | 9E-05 | 9.35     | 9E-04  | 1E-04 | 0.14   |
| D-Glutamine and D-glutamate metabolism      | 11         | 2    | 1E-05 | 11.13    | 2E-04  | 2E-05 | 0.14   |
| Pyrimidine metabolism                       | 60         | 6    | 4E-12 | 26.29    | 2E-10  | 2E-10 | 0.13   |
| Glycerophospholipid metabolism              | 39         | 4    | 6E-10 | 21.21    | 3E-08  | 5E-09 | 0.13   |
| Propanoate metabolism                       | 35         | 6    | 3E-09 | 19.79    | 1E-07  | 9E-09 | 0.13   |
| Phenylalanine metabolism                    | 45         | 4    | 5E-10 | 21.45    | 2E-08  | 5E-09 | 0.12   |
| Ascorbate and aldarate metabolism           | 45         | 1    | 2E-01 | 1.41     | 7E-01  | 3E-01 | 0.11   |
| Tryptophan metabolism                       | 79         | 1    | 3E-06 | 12.76    | 6E-05  | 5E-06 | 0.11   |

Table 2: Metabolic Pathway Analysis of Golden Hamster (HFD vs HFD + AG).

|                                             | Total Cmpd | Hits | Raw p    | -log(p) | Holm p   | FDR      | Impact |
|---------------------------------------------|------------|------|----------|---------|----------|----------|--------|
| Synthesis and degradation of ketone bodies  | 6          | 3    | 1.52E-10 | 22.608  | 3.52E-09 | 2.60E-10 | 0.70   |
| Alanine, aspartate and glutamate metabolism | 24         | 7    | 2.52E-12 | 26.706  | 8.32E-11 | 6.37E-12 | 0.68   |
| Glycine, serine and threonine metabolism    | 48         | 10   | 3.37E-15 | 33.323  | 1.59E-13 | 2.55E-14 | 0.53   |
| Taurine and hypotaurine metabolism          | 20         | 3    | 4.21E-09 | 19.287  | 5.89E-08 | 5.57E-09 | 0.36   |
| D-Glutamine and D-glutamate metabolism      | 11         | 2    | 0.001046 | 6.8631  | 0.004183 | 0.001108 | 0.35   |
| Arginine and proline metabolism             | 77         | 9    | 4.33E-15 | 33.074  | 1.99E-13 | 2.87E-14 | 0.32   |
| beta-Alanine metabolism                     | 28         | 6    | 1.31E-12 | 27.364  | 4.83E-11 | 4.07E-12 | 0.26   |
| Pantothenate and CoA biosynthesis           | 27         | 5    | 1.69E-17 | 38.622  | 8.43E-16 | 2.23E-16 | 0.25   |
| Pyruvate metabolism                         | 32         | 3    | 1.78E-06 | 13.238  | 1.78E-05 | 2.15E-06 | 0.24   |
| Pyrimidine metabolism                       | 60         | 8    | 2.75E-10 | 22.014  | 5.78E-09 | 4.42E-10 | 0.22   |
| Methane metabolism                          | 34         | 7    | 1.51E-14 | 31.821  | 6.66E-13 | 8.03E-14 | 0.20   |
| Aminoacyl-tRNA biosynthesis                 | 75         | 17   | 1.39E-17 | 38.814  | 7.10E-16 | 2.23E-16 | 0.17   |
| Lysine degradation                          | 47         | 2    | 1.46E-09 | 20.343  | 2.21E-08 | 1.99E-09 | 0.15   |
| Glyoxylate and dicarboxylate metabolism     | 50         | 2    | 2.37E-06 | 12.955  | 2.13E-05 | 2.79E-06 | 0.14   |
| Histidine metabolism                        | 44         | 2    | 1.95E-07 | 15.448  | 2.15E-06 | 2.41E-07 | 0.14   |
| Inositol phosphate metabolism               | 39         | 1    | 0.000174 | 8.6589  | 0.001041 | 0.000192 | 0.14   |
| Glycerophospholipid metabolism              | 39         | 4    | 3.22E-10 | 21.858  | 6.43E-09 | 5.01E-10 | 0.13   |
| Propanoate metabolism                       | 35         | 6    | 1.80E-18 | 40.859  | 9.54E-17 | 9.54E-17 | 0.13   |
| Phenylalanine metabolism                    | 45         | 4    | 1.51E-12 | 27.216  | 5.30E-11 | 4.22E-12 | 0.12   |
| Ascorbate and aldarate metabolism           | 45         | 2    | 0.001801 | 6.3194  | 0.005403 | 0.001872 | 0.11   |
| Tryptophan metabolism                       | 79         | 1    | 3.58E-10 | 21.751  | 6.80E-09 | 5.42E-10 | 0.11   |

Table 3: Metabolic Pathway Analysis of Golden Hamster (HFD vs HFD + DMY).

|                                             | Total Cmpd | Hits | Raw p    | -<br>log(p) | Holm p   | FDR      | Impact |
|---------------------------------------------|------------|------|----------|-------------|----------|----------|--------|
| Synthesis and degradation of ketone bodies  | 6          | 3    | 1.90E-12 | 26.987      | 7.23E-11 | 6.31E-12 | 0.70   |
| Alanine, aspartate and glutamate metabolism | 24         | 7    | 1.08E-12 | 27.554      | 4.65E-11 | 4.96E-12 | 0.68   |
| Glycine, serine and threonine metabolism    | 48         | 10   | 1.97E-14 | 31.558      | 9.85E-13 | 2.49E-13 | 0.53   |
| Taurine and hypotaurine metabolism          | 20         | 3    | 2.00E-07 | 15.427      | 3.39E-06 | 2.86E-07 | 0.36   |
| D-Glutamine and D-glutamate metabolism      | 11         | 2    | 0.02176  | 3.8277      | 0.08704  | 0.023066 | 0.35   |
| Arginine and proline metabolism             | 77         | 9    | 2.35E-14 | 31.383      | 1.15E-12 | 2.49E-13 | 0.32   |
| beta-Alanine metabolism                     | 28         | 6    | 1.72E-13 | 29.39       | 7.75E-12 | 1.01E-12 | 0.26   |
| Pantothenate and CoA biosynthesis           | 27         | 5    | 4.59E-07 | 14.595      | 5.96E-06 | 5.93E-07 | 0.25   |
| Pyruvate metabolism                         | 32         | 3    | 2.47E-07 | 15.215      | 3.95E-06 | 3.44E-07 | 0.24   |
| Pyrimidine metabolism                       | 60         | 8    | 2.67E-11 | 24.345      | 8.82E-10 | 6.75E-11 | 0.22   |
| Methane metabolism                          | 34         | 7    | 3.99E-15 | 33.154      | 2.08E-13 | 1.06E-13 | 0.20   |
| Aminoacyl-tRNA biosynthesis                 | 75         | 17   | 5.57E-11 | 23.611      | 1.73E-09 | 1.28E-10 | 0.17   |
| Lysine degradation                          | 47         | 2    | 1.24E-10 | 22.814      | 3.71E-09 | 2.67E-10 | 0.15   |
| Glyoxylate and dicarboxylate metabolism     | 50         | 2    | 5.66E-08 | 16.687      | 1.19E-06 | 9.09E-08 | 0.14   |
| Histidine metabolism                        | 44         | 2    | 1.84E-10 | 22.417      | 5.15E-09 | 3.75E-10 | 0.14   |
| Inositol phosphate metabolism               | 39         | 1    | 0.010427 | 4.5633      | 0.052136 | 0.011278 | 0.14   |
| Glycerophospholipid metabolism              | 39         | 4    | 1.75E-11 | 24.767      | 5.96E-10 | 4.65E-11 | 0.13   |
| Propanoate metabolism                       | 35         | 6    | 4.25E-07 | 14.671      | 5.95E-06 | 5.63E-07 | 0.13   |
| Phenylalanine metabolism                    | 45         | 4    | 1.12E-12 | 27.516      | 4.71E-11 | 4.96E-12 | 0.12   |
| Ascorbate and aldarate metabolism           | 45         | 2    | 0.001    | 6.9075      | 0.007002 | 0.001128 | 0.11   |
| Tryptophan metabolism                       | 79         | 1    | 4.38E-10 | 21.55       | 1.14E-08 | 8.28E-10 | 0.11   |
